# Supplementary material for: Portable self-powered photoelectrochemical immunosensor based on Cu3SnS4 nanoflower for ultra-sensitive and real-time detection of human cytochrome c
Source: Royal Society of Chemistry journal article supplement (doi:10.1039/d3qi01234d), 2023-01-01
Supplement: d3qi01234d2.pdf [file d3qi01234d2.pdf]

## Supporting Information

### **Portable Self-powered Photoelectrochemical Immunosensor Based on $\text{Cu}_3\text{SnS}_4$**

### **Nanoflower for Ultra-sensitive and Real-time Detection of Human Cytochrome *c***

Xin Zhang<sup>a</sup>, Ling-Hua Jin<sup>a</sup>, Yan-Yan Li<sup>b</sup>, Zi-Zhen Xiao<sup>a</sup>, Yu Feng<sup>b</sup>, Ying-Wu Lin<sup>b\*</sup>,

and Ye Zhang<sup>a\*</sup>

**a.** Lab of Optoelectronic Technology for Low Dimensional Nanomaterials, School of Chemistry and Chemical Engineering, University of South China, Hengyang 421001, China

E-mail: [yezhang@usc.edu.cn](mailto:yezhang@usc.edu.cn)

**b.** Key Lab of Protein Structure and Function of Universities in Hunan Province, School of Chemistry and Chemical Engineering, University of South China, Hengyang 421001, China

E-mail: [ywlin@usc.edu.cn](mailto:ywlin@usc.edu.cn)

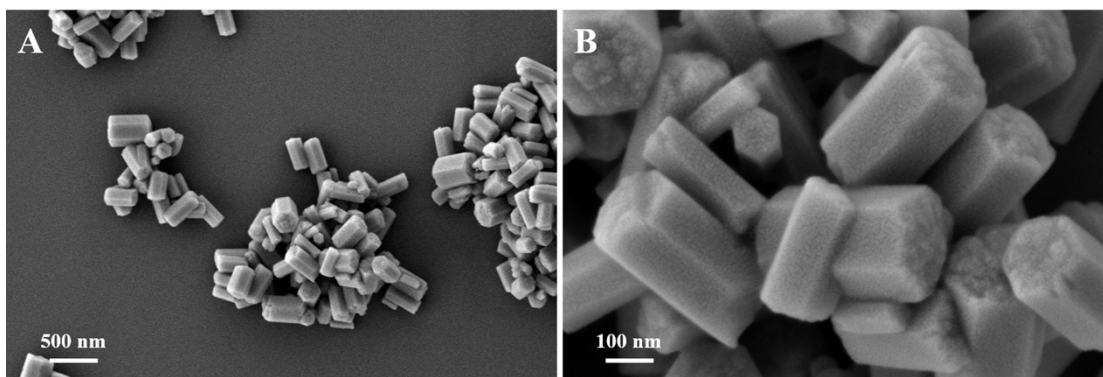

**Figure S1.** (A) SEM image of  $\text{CuSn(OH)}_6$  (500 nm) and (B) SEM image of  $\text{CuSn(OH)}_6$  (100 nm).

X-ray diffraction (XRD) was employed to analyze the purity and crystal structure of the products. As indicated in **Figure S2**,  $\text{CuSn(OH)}_6$  is a tetragonal sulfide with five strong peaks located at  $2\theta$  positions of  $12.5^\circ$ ,  $21.8^\circ$ ,  $25.2^\circ$ ,  $29.7^\circ$ ,  $32.4^\circ$ ,  $33.5^\circ$ ,  $39.3^\circ$ ,  $44.4^\circ$ ,  $45.4^\circ$ ,  $49.1^\circ$ ,  $51.7^\circ$ ,  $54.3^\circ$ ,  $60.8^\circ$ ,  $67.7^\circ$  and  $78.3^\circ$ , corresponding to diffractions from the (100), (110), (200), (201), (102), (210), (202), (220), (212), (103), (400), (203), (410), (204) and (332) planes of the  $\text{CuSn(OH)}_6$  crystal, which is consistent with the description in the literature<sup>1,2</sup>.

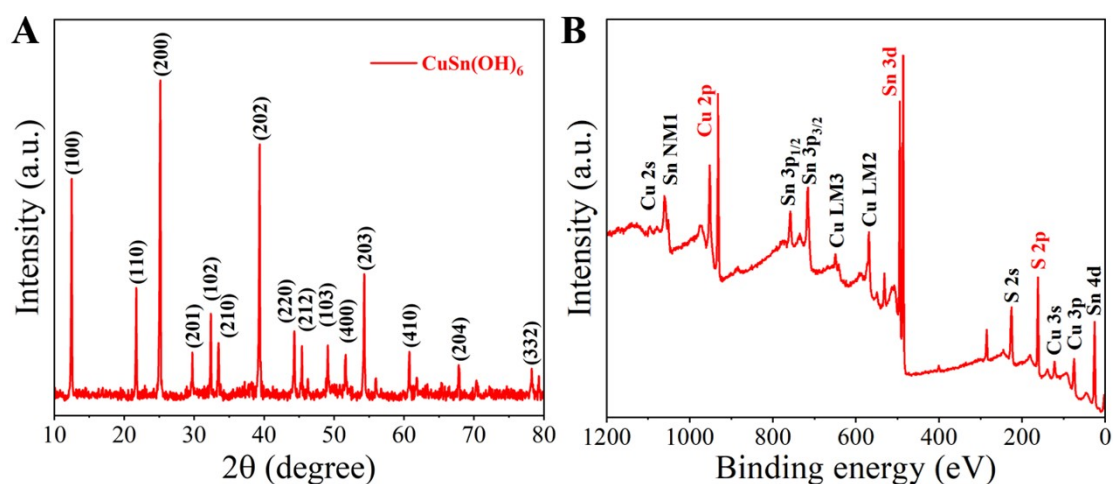

**Figure S2.** (A) XRD patterns of  $\text{CuSn(OH)}_6$ ; (B) XPS spectra of  $\text{Cu}_3\text{SnS}_4$ .

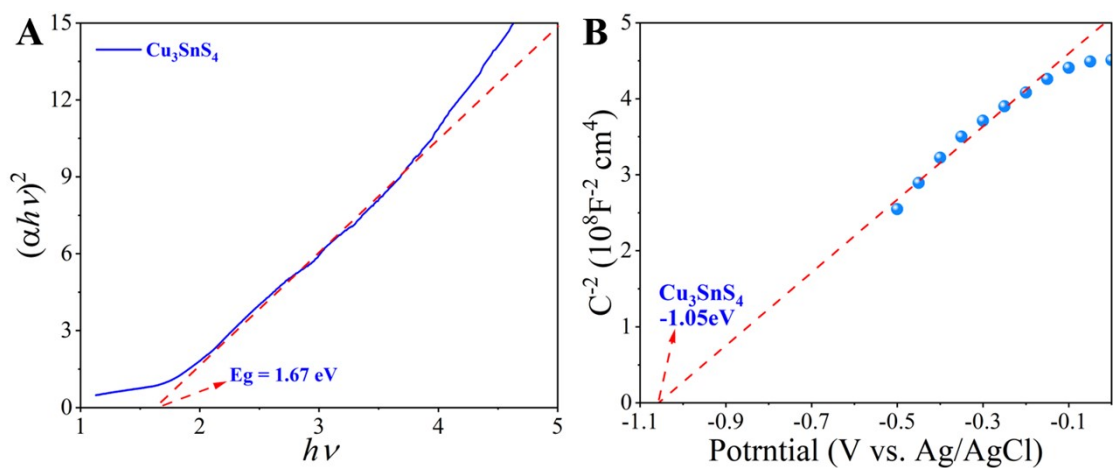

**Figure S3.** (A) Plots of  $(ah\nu)^2$  vs.  $(h\nu)$  used to evaluate the optical bandgaps of  $\text{Cu}_3\text{SnS}_4$ ; (B)

Mott-Schottky curves of  $\text{Cu}_3\text{SnS}_4$ .

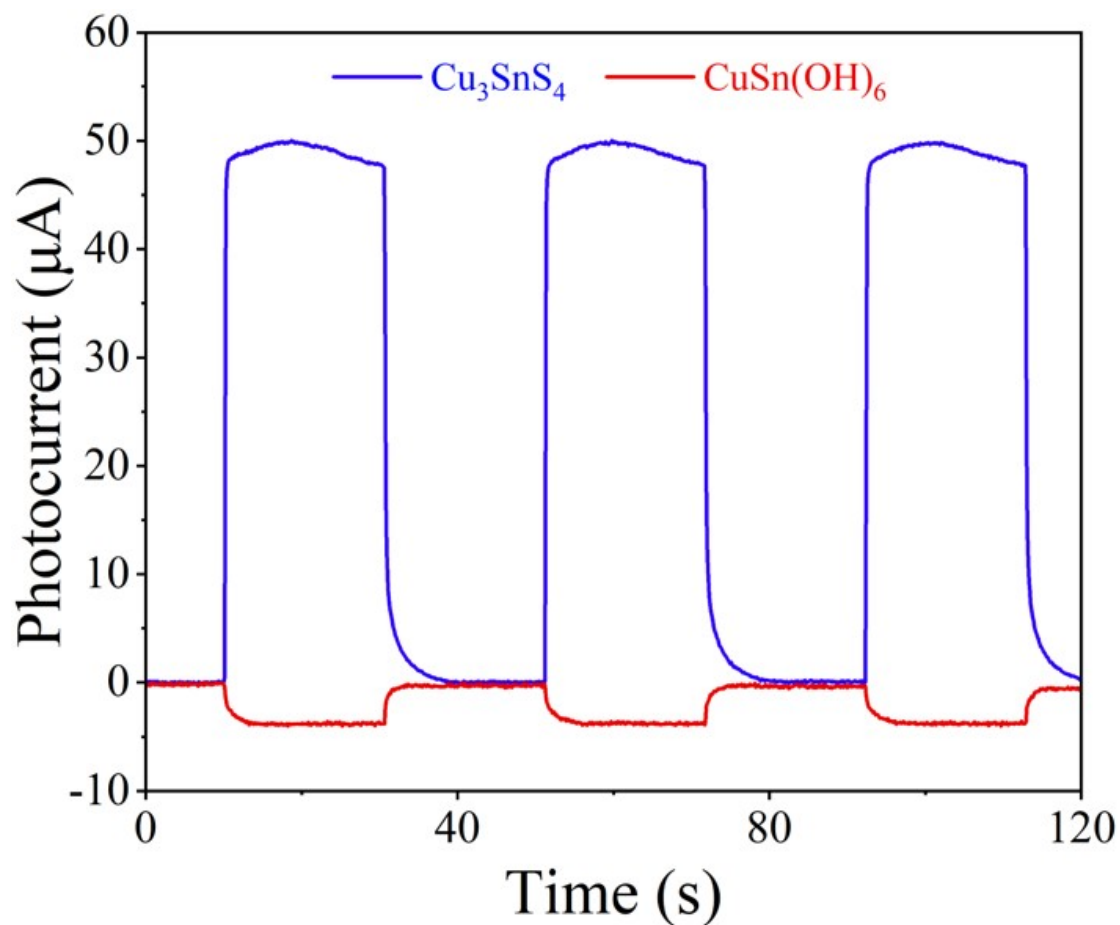

**Figure S4.** Photocurrent response of electrodes of different materials.

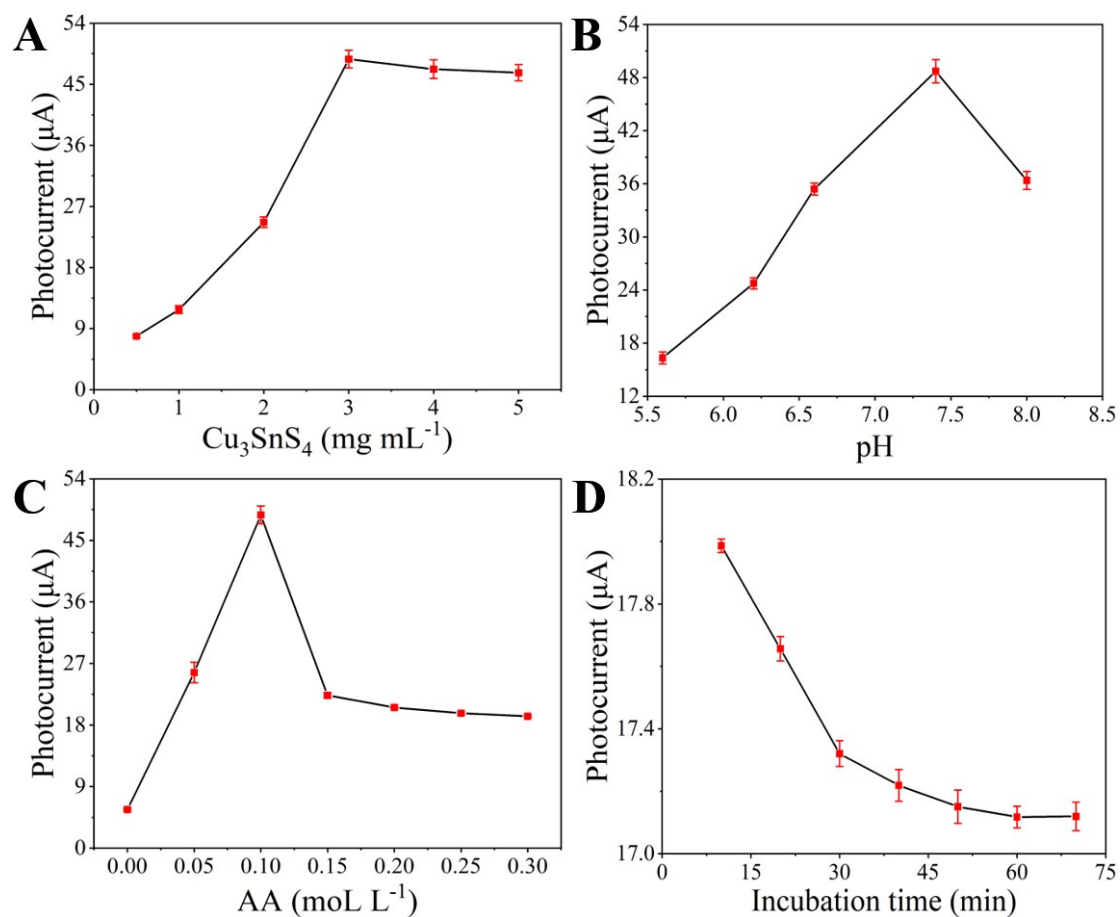

**Figure S5.** Effects of (A) the concentration of  $\text{Cu}_3\text{SnS}_4$ ; (B) the pH value of the PBS; (C) the concentration of AA; (D) the incubation time of Cyt *c*.

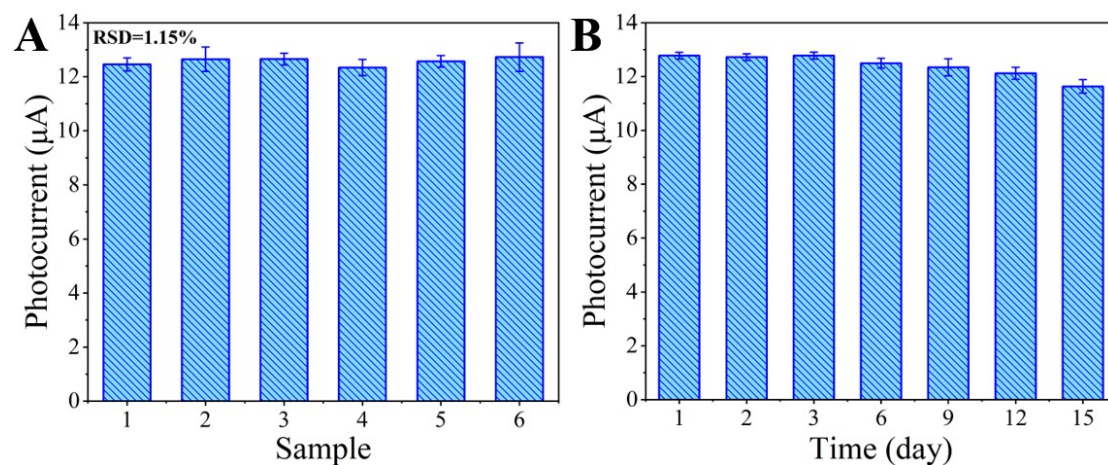

**Figure S6.** (A) Reproducibility (Cyt *c*: 100 pM) and (B) Storage stability of the PEC immunosensor.

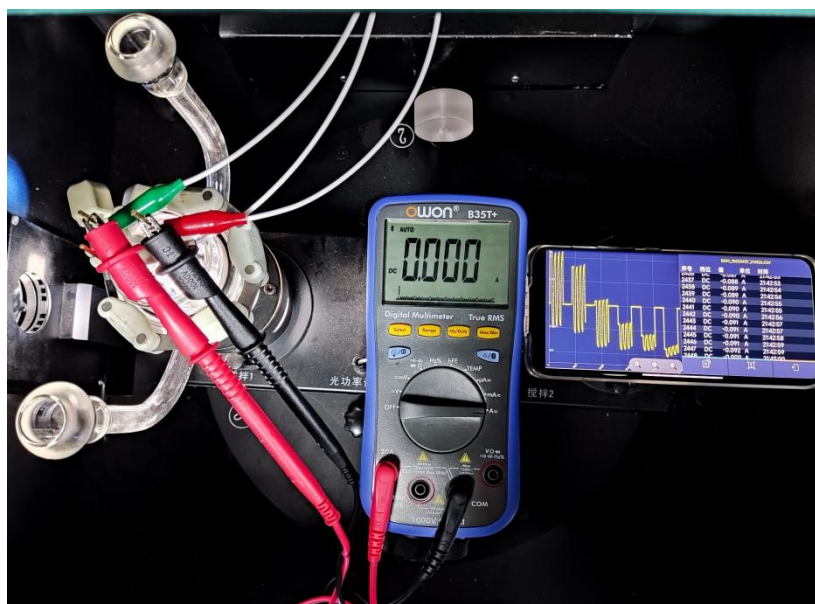

**Figure S7.** Real-time detection of Cyt *c* system.

**Table S1** Simulation parameters of the equivalent circuit components

| Electrode                                                                       | $R_s$ ( $\Omega$ ) | $R_{et}$ ( $\Omega$ ) | $I$                |
|---------------------------------------------------------------------------------|--------------------|-----------------------|--------------------|
| $\text{Cu}_3\text{SnS}_4$                                                       | 22.86              | 22.13                 | 49.8 $\mu\text{A}$ |
| $\text{Cu}_3\text{SnS}_4/\text{CS}$                                             | 23.53              | 42.08                 | 35.6 $\mu\text{A}$ |
| $\text{Cu}_3\text{SnS}_4/\text{CS}/\text{anti-Cyt } c$                          | 23.97              | 68.29                 | 28.8 $\mu\text{A}$ |
| $\text{Cu}_3\text{SnS}_4/\text{CS}/\text{anti-Cyt } c/\text{BSA}$               | 23.70              | 79.75                 | 19.6 $\mu\text{A}$ |
| $\text{Cu}_3\text{SnS}_4/\text{CS}/\text{anti-Cyt } c/\text{BSA}/\text{Cyt } c$ | 23.30              | 97.00                 | 12.6 $\mu\text{A}$ |

**Table S2** Different Cyt *c* detection methods were compared

| Method       | Nanomaterials            | Linear range                         | Detection limit   | References |
|--------------|--------------------------|--------------------------------------|-------------------|------------|
| Fluorescence | CdTe                     | 0.5 $\mu\text{M}$ -2.5 $\mu\text{M}$ | 0.5 $\mu\text{M}$ | 3          |
| Fluorescence | $\text{VS}_2$ -Nanosheet | 0.75 nM-50 nM                        | 0.5 nM            | 4          |

|                                    |                                             |                                    |                |                      |
|------------------------------------|---------------------------------------------|------------------------------------|----------------|----------------------|
| Fluorescence                       | DNA-AgNCs@tween 80                          | 0.8 nM-20000 nM                    | 0.8 nM         | 5                    |
| Colorimetric,<br>chemiluminescence | $\beta$ -Co(OH) <sub>2</sub> CMk            | 1 pM-5 $\mu$ M,<br>50 $\mu$ M-1 mM | 2 fM           | 6                    |
| EIS                                | Cyt-c/Polypyrrole/SPE                       | 10 pM-1 nM                         | 5 pM           | 7                    |
| EIS                                | CdS/graphene                                | 1 nM-100 nM                        | 0.3 nM         | 8                    |
| PEC                                | CdS/CuInS <sub>2</sub> /Au/TiO <sub>2</sub> | 5 pM-100 nM                        | 5 pM           | 9                    |
| <b>PEC</b>                         | <b>Cu<sub>3</sub>SnS<sub>4</sub></b>        | <b>1 fM-1000 nM</b>                | <b>0.35 fM</b> | <b>This<br/>work</b> |

**Table S3.** Analytical results of Cyt *c* in human serum samples

| Sample     | Added (nM) | Detection content<br>(nM, n=3) | Average content<br>(nM) | RSD (%) | Recovery (%) |
|------------|------------|--------------------------------|-------------------------|---------|--------------|
| Serum #789 | 0.1        | 0.085、 0.095、 0.108            | 0.096                   | 1.55    | 96.17        |
| Serum #757 | 0.1        | 0.085、 0.116、 0.92             | 0.098                   | 1.89    | 97.63        |
| Serum #730 | 0.5        | 0.465、 0.554、 0.486            | 0.502                   | 3.64    | 100.4        |
| Serum #729 | 1          | 1.065、 0.851、 0.956            | 0.958                   | 1.34    | 95.76        |

### References:

1. J. Huang, X. Xu, C. Gu, S. Yao, Y. Sun and J. Liu, Large-Scale Selective Preparation of Porous SnO<sub>2</sub> 3D Architectures and Their Gas-Sensing Property, *CrystEngComm*, 2012, **14**.
2. J. Huang, Y. Wang, C. Gu and M. Zhai, Large Scale Synthesis of Uniform CuS Nanotubes by a Sacrificial Templating Method and Their Application as an Efficient Photocatalyst, *Materials Letters*, 2013, **99**, 31-34.
3. R. M. Amin, S. A. Elfeky, T. Verwanger and B. Krammer, Fluorescence-based CdTe Nanosensor for Sensitive Detection of Cytochrome *C*, *Biosens. Bioelectron.*, 2017, **98**, 415-420.
4. X. Yin, J. Cai, H. Feng, Z. Wu, J. Zou and Q. Cai, A VS<sub>2</sub>/Aptamer-Based Cytochrome *c* Sensor was Successfully Constructed by First Applying the DNA-Adsorbing Ability/Fluorescence-Quenching Properties of VS<sub>2</sub> in Bioanalysis., *New J. Chem.*, 2014.
5. Y. Qin, M. Daniyal, W. Wang, Y. Jian, W. Yang, Y. Qiu, C. Tong, W. Wang and B. Liu, An Enhanced Silver Nanocluster System for Cytochrome *c* Detection and Natural Drug Screening Targeted for Cytochrome *c*, *Sens. Actuators B Chem*, 2019, **291**, 485-492.

6. F. Mesgari, S. M. Beigi, N. Fakhri, M. Hosseini, M. Aghazadeh and M. R. Ganjali, Paper-Based Chemiluminescence and Colorimetric Detection of Cytochrome *c* by Cobalt Hydroxide Decorated Mesoporous Carbon, *Microchemical Journal*, 2020, **157**.
7. Q. Wen, X. Zhang, J. Cai and P. H. Yang, A Novel Strategy for Real-Time and in Situ Detection of Cytochrome *c* and Caspase-9 in Hela Cells During Apoptosis, *Analyst*, 2014, **139**, 2499-2506.
8. Y.-P. Dong, J. Wang, Y. Peng and J.-J. Zhu, Electrogenerated Chemiluminescence Resonance Energy Transfer Between Luminol and CdS/Graphene Nanocomposites and its Sensing Application, *Journal of Electroanalytical Chemistry*, 2016, **781**, 109-113.
9. L. Wang, W. Gu, P. Sheng, Z. Zhang, B. Zhang and Q. Cai, A label-free Cytochrome *c* Photoelectrochemical Aptasensor Based on CdS/CuInS<sub>2</sub>/Au/TiO<sub>2</sub> Nanotubes, *Sens. Actuators B Chem*, 2019, **281**, 1088-1096.
